# Supplementary material for: An antibacterial collagen membrane crosslinked by the inclusion complex of β-cyclodextrin dialdehyde and ofloxacin for bacterial keratitis
Source: Royal Society of Chemistry journal article supplement (doi:10.1039/c8ra02160k), 2018-01-01
Supplement: c8ra02160k1.pdf [file c8ra02160k1.pdf]

## Supporting information

### **An antibacterial collagen membrane crosslinked by the inclusion complex of $\beta$ -cyclodextrin dialdehyde and Ofloxacin for bacterial keratitis**

**Yawei Chen <sup>a, b</sup>, Wenjing Song <sup>a, b</sup>, Xuan Zhao <sup>a, b</sup>, Qianqian Han <sup>c</sup>, Li Ren <sup>a, b</sup>**

*<sup>a</sup> School of Materials Science and Engineering, South China University of Technology, Guangzhou 510641, China*

*<sup>b</sup> National Engineering Research Center for Tissue Restoration and Reconstruction, Guangzhou 510006, China*

*<sup>c</sup> Department of Biomaterials, National Institutes for Food and Drug Control, Beijing 102629, China*

**\* Author for correspondence:**

**Wenjing Song, Ph.D., Email: [phsongwj@scut.edu.cn](mailto:phsongwj@scut.edu.cn)**

**# Author for correspondence:**

**Li Ren, Ph.D., Email: [psliren@scut.edu.cn](mailto:psliren@scut.edu.cn)**

## Characterization of $\beta$ -CD-DA

FT-IR spectra of  $\beta$ -CD,  $\beta$ -CD-DA were shown in the Fig. S1. There was a newly formed peak at  $1734\text{ cm}^{-1}$ , which belonged to the contraction vibration of the C=O group, and the hydroxyl band shifted from  $3422\text{ cm}^{-1}$  to  $3435\text{ cm}^{-1}$  in comparison to  $\beta$ -CD, indicating the formation of the aldehyde group in the synthesized products. In two figures,  $707\text{ cm}^{-1}$  for ring vibration peak,  $758\text{ cm}^{-1}$  for sugar ring breathing vibration peak,  $859\text{ cm}^{-1}$  for pyranoside band characteristic peak, and  $948\text{ cm}^{-1}$  for  $\alpha$ -1, 4 band frame vibration peak associated with the special three-dimensional structure of  $\beta$ -cyclodextrin were no obvious difference. The titration results (Table S1) showed that there were approximately 2 aldehyde groups in each  $\beta$ -cyclodextrin aldehyde molecule, indicating the successful synthesis of  $\beta$ -CD-DA.

### Inclusion rate

UV spectra of OFLX and  $\beta$ -CD-DA in deionized water ( $50\text{ }\mu\text{g ml}^{-1}$ ) was showed in Fig 4. The maximum absorption peak of OFLX was at  $287\text{ nm}$ , and the  $\beta$ -CD-DA had almost no absorption peak at this wavelength. Therefore,  $287\text{ nm}$  was selected as the detection wavelength of OFLX in the inclusion. Then, absorbance (A) value of various concentrations of OFLX was measured at  $287\text{ nm}$ , and the regression equation and correlation value were obtained:

$$A = 0.0118C + 0.0736, R^2 = 0.9999$$

where A is the absorbance, C is the concentration of OFLX and R<sup>2</sup> is the correlation coefficient. After, the inclusion rate was calculated to be 81.2% (Table S2) according to the above formulas. There were many factors affecting the inclusion rate, such as temperature, time and the ratio of host and guest, which could be selected to obtain the optimal condition for inclusion and the high inclusion rate.

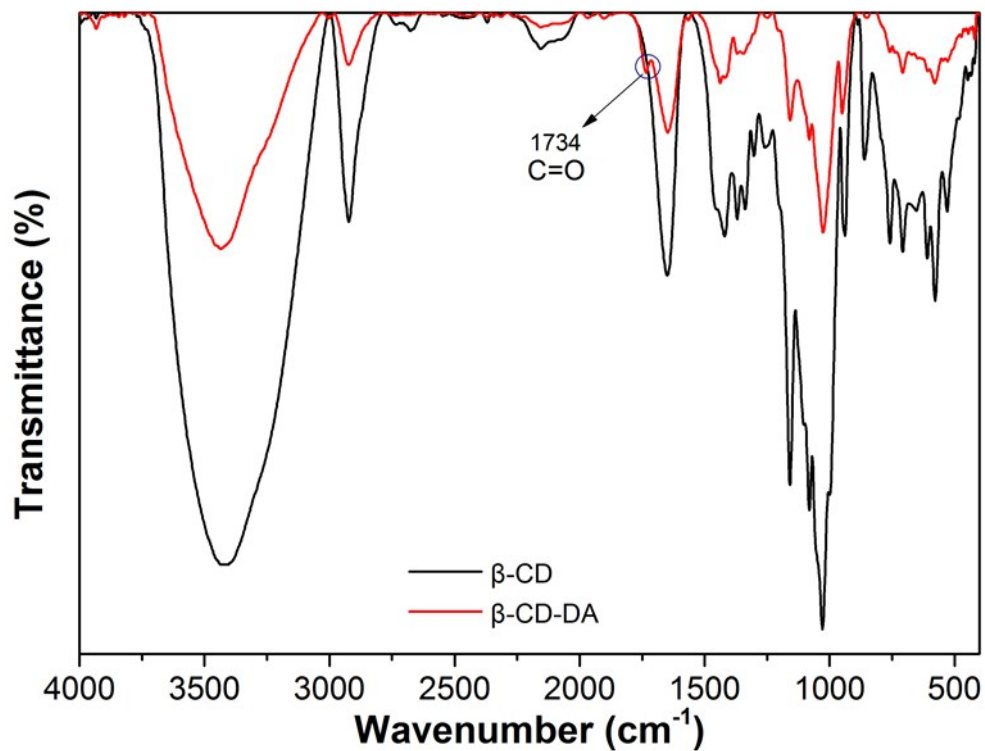

Fig. S1 FT-IR spectra of  $\beta$ -CD,  $\beta$ -CD-DA.

Table S1 The titration of number of aldehyde group in each  $\beta$ -CD-DA

| No. | NaOH/mL | H <sub>2</sub> SO <sub>4</sub> /mL | Number of aldehyde group in each $\beta$ -CD |
|-----|---------|------------------------------------|----------------------------------------------|
| 1   | 48.87   | 20.00                              | 1.99                                         |
| 2   | 48.82   | 20.00                              | 1.97                                         |
| 3   | 48.93   | 20.00                              | 2.01                                         |

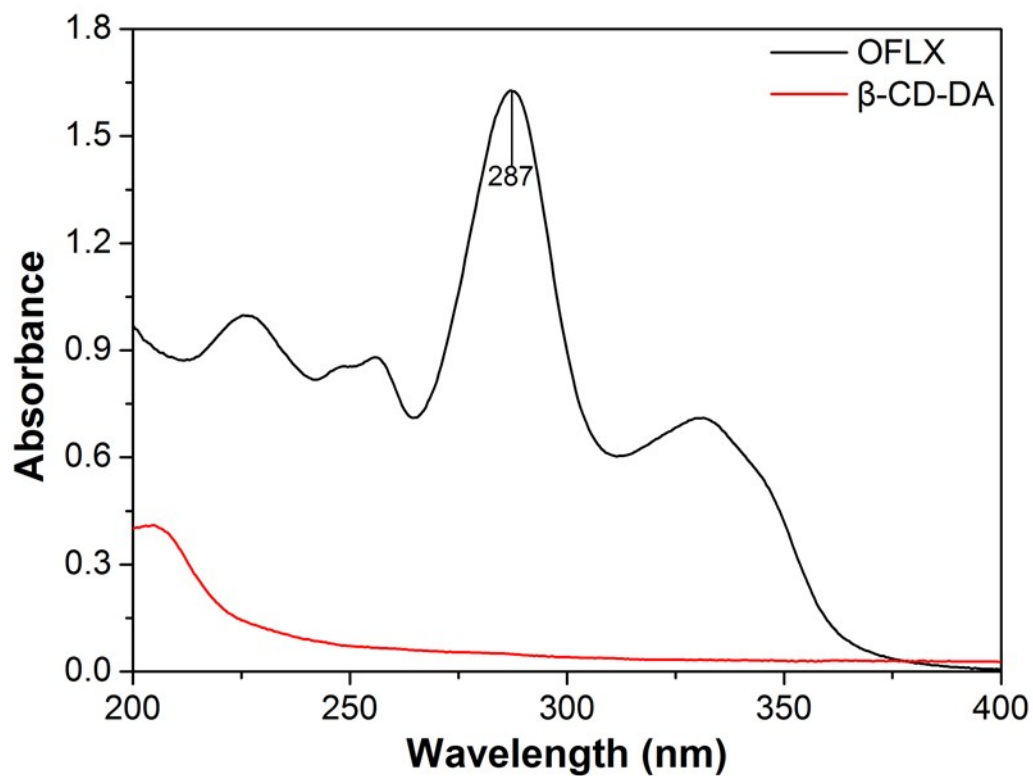

Fig. S2 UV absorption spectra of OFLX and  $\beta$ -CD-DA, [OFLX]=50  $\mu\text{g/mL}$ , [ $\beta$ -CD-DA] = 50  $\mu\text{g/mL}$ .

Table S2 The inclusion rate results of  $\beta$ -CD-DA/OFLX inclusion complex

| No. | OFLX feeding amount (mg) | OFLX mass in inclusion complex (mg) | Inclusion rate (%) | Average of inclusion rate (%) | RSD (%) |
|-----|--------------------------|-------------------------------------|--------------------|-------------------------------|---------|
| 1   | 60.0                     | 48.6                                | 81.0               |                               |         |
| 2   | 60.2                     | 48.9                                | 81.2               | 81.2                          | 0.3     |
| 3   | 60.1                     | 49.0                                | 81.5               |                               |         |
